# Supplementary material for: Preoperative refraction, age and optical zone as predictors of optical and visual quality after advanced surface ablation in patients with high myopia: a cross-sectional study
Source: PubMed Central journal article supplement — BMJ Open. 2018 Jun 4;8(6):e023877. doi: 10.1136/bmjopen-2018-023877 (PMC5988164; doi:10.1136/bmjopen-2018-023877), 2018-06-04
Supplement: bmjopen-2018-023877.draft_revisions.pdf [file bmjopen-2018-023877.draft_revisions.pdf]

# BMJ Open

BMJ Open is committed to open peer review. As part of this commitment we make the peer review history of every article we publish publicly available.

When an article is published we post the peer reviewers' comments and the authors' responses online. We also post the versions of the paper that were used during peer review. These are the versions that the peer review comments apply to.

The versions of the paper that follow are the versions that were submitted during the peer review process. They are not the versions of record or the final published versions. They should not be cited or distributed as the published version of this manuscript.

BMJ Open is an open access journal and the full, final, typeset and author-corrected version of record of the manuscript is available on our site with no access controls, subscription charges or pay-per-view fees (<http://bmjopen.bmj.com>).

If you have any questions on BMJ Open's open peer review process please email [info.bmjopen@bmj.com](mailto:info.bmjopen@bmj.com)

# BMJ Open

## Preoperative refraction, age and optical zone as predictors of optical and visual quality after advanced surface ablation in high myopic patients: a cross-sectional study

|                               |                                                                                                                                                                                                                                                                                                                     |
|-------------------------------|---------------------------------------------------------------------------------------------------------------------------------------------------------------------------------------------------------------------------------------------------------------------------------------------------------------------|
| Journal:                      | <i>BMJ Open</i>                                                                                                                                                                                                                                                                                                     |
| Manuscript ID                 | bmjopen-2018-023877                                                                                                                                                                                                                                                                                                 |
| Article Type:                 | Research                                                                                                                                                                                                                                                                                                            |
| Date Submitted by the Author: | 07-May-2018                                                                                                                                                                                                                                                                                                         |
| Complete List of Authors:     | Zhou, Jiaqi<br>Xu, Ye; Eye and ENT Hospital of Fudan University, Ophthalmology and Vision Science<br>Li, Meiyang; Eye & ENT Hospital of Fudan University<br>Knorz, Michael; FreeVis LASIK Zentrum, Universitätsmedizin Mannheim<br>Zhou, Xingtao; Eye & ENT Hospital, Fudan University, Department of Ophthalmology |
| Keywords:                     | OPHTHALMOLOGY, Cataract and refractive surgery < OPHTHALMOLOGY, Ophthalmology < SURGERY                                                                                                                                                                                                                             |
|                               |                                                                                                                                                                                                                                                                                                                     |

SCHOLARONE™  
Manuscripts

Peer Review Only

1  
2  
3 **Title: Preoperative refraction, age and optical zone as predictors of**  
4 **optical and visual quality after advanced surface ablation in high myopic**  
5 **patients: a cross-sectional study**  
6  
7  
8  
9

10  
11 Authors: <sup>1,2</sup>Jiaqi Zhou, MD, PHD  
12

13  
14  
15 <sup>1,2</sup>Ye Xu, MD, PHD  
16

17  
18 <sup>1,2</sup>Meiyan Li, MD, PHD  
19

20  
21  
22 <sup>3</sup>Michael C. Knorz, MD  
23

24  
25 <sup>1,2</sup>Xingtao Zhou<sup>#</sup>, MD, PHD  
26

27  
28  
29 <sup>#</sup>Correspondence: Xingtao Zhou  
30

31  
32 Institution: <sup>1</sup>Department of Ophthalmology and Vision Science, Eye and ENT  
33 Hospital, Fudan University, Shanghai, China; <sup>2</sup>NHC Key Laboratory of  
34 Myopia(Fudan University), China.  
35  
36  
37

38  
39  
40 <sup>3</sup>FreeVis LASIK Zentrum, Universitätsmedizin Mannheim, Theodor  
41 Kutzer Ufer 1-3, 68167 Mannheim  
42

43  
44  
45 Address: 83 Fenyang Road, Xuhui District, Shanghai, China  
46

47  
48  
49 E-mail: [doctzhouxingtao@163.com](mailto:doctzhouxingtao@163.com)  
50

51  
52  
53 Work phone: 86-21-64377134  
54

1  
2  
3 This work was supported by the National Natural Science Foundation of China  
4  
5 (Grant No. 81500753). The funding organization had no role in the design or  
6  
7 conduct of this research.  
8  
9

10  
11 Conflict of Interest: No conflicting relationship exists for any author.  
12  
13

14  
15 Date sharing statement: No additional data are available.  
16  
17

18  
19 Keywords: refraction, cornea, advanced surface ablation, visual quality  
20  
21  
22  
23  
24  
25  
26  
27  
28  
29  
30  
31  
32  
33  
34  
35  
36  
37  
38  
39  
40  
41  
42  
43  
44  
45  
46  
47  
48  
49  
50  
51  
52  
53  
54  
55  
56  
57  
58  
59  
60

## ABSTRACT

**Objective:** To investigate the factors associated with optical and visual quality of advanced surface ablation (ASA) in high myopia.

**Design:** A cross-sectional study of high myopic eyes treated with LASEK/epi-LASIK.

**Setting:** Eye and ENT Hospital of Fudan University in Shanghai

**Methods:** One hundred thirty-eight high myopic eyes (138 patients) (myopia -6 D or more) were examined more than 12 months after LASEK or Epi-LASIK with advanced surface ablation on the MEL 80 excimer laser (Zeiss AG, Jena, Germany). Refraction, higher-order aberrations (HOAs) and contrast sensitivity before and after surgery were evaluated. Factors including preoperative refraction, age, gender, central corneal thickness, pupil size, optical diameter, ablation depth, and flap creation method were analyzed for association with postoperative high order aberration, contrast and glare sensitivities, and different analytic diameters.

**Results:** HOAs increased significantly postoperatively ( $P < 0.05$ ), with the most significant change found in Z(4,0). At a 5-mm analysis diameter, increased coma was associated with age; increased spherical aberration difference was associated with age, optical zone diameter, and method of epithelial flap creation. At a 3-mm analysis diameter, none of the factors contributed to changes in HOAs. Higher preoperative refractive error was associated with

1  
2  
3 decreased contrast and glare sensitivity at each spatial frequency.  
4  
5

6  
7 **Conclusion:** A larger optical zone diameter design is recommended to  
8  
9 achieve better visual quality in advanced surface ablation for high myopia  
10  
11 correction. Age and preoperative refraction may help predict postoperative  
12  
13 visual quality.  
14  
15

16  
17  
18  
19  
20  
21  
22  
23  
24  
25  
26  
27  
28  
29  
30  
31  
32  
33  
34  
35  
36  
37  
38  
39  
40  
41  
42  
43  
44  
45  
46  
47  
48  
49  
50  
51  
52  
53  
54  
55  
56  
57  
58  
59  
60

For peer review only

1  
2  
3 Article summary  
4

5 Strengths and limitations of this study  
6

7  
8 (1) This present study further analyzes the visual quality of high myopic  
9 patients (-6D or more), while previous investigations on visual quality were  
10 focused on low and moderate myopia.  
11  
12

13  
14  
15 (2) All cases were performed by a single experienced surgeon, removing any  
16 confounding effects from inter-surgeon variability or training level.  
17  
18

19  
20 (3) Participants in this study were recruited only from Shanghai, which may  
21 lead to limited external validity.  
22  
23

24 (4) The contrast sensitivity measurement range was limited in this study, and  
25 should be expanded to a larger range of frequencies in future studies.  
26  
27  
28  
29  
30  
31  
32  
33  
34  
35  
36  
37  
38  
39  
40  
41  
42  
43  
44  
45  
46  
47  
48  
49  
50  
51  
52  
53  
54  
55  
56  
57  
58  
59  
60

## Introduction

Corneal refractive surgeries have rapidly evolved in the past 30 years. In 2003, the term “advanced surface ablation” was coined to reflect the improvements in surface ablation from the early days of photorefractive keratectomy (PRK). Today’s advanced surface ablation procedures include numerous techniques, including laser epithelial keratomileusis (LASEK) and epipolis laser in-situ keratomileusis (epi-LASIK).

Visual quality following refractive surgery is a major concern, especially for high myopia patients. Pupil size, initial refractive error, optical zone size, decentration, and residual refractive error are the main factors affecting visual quality after corneal ablation procedures.<sup>[1-3]</sup> Improved ablation methods such as Q-optimized algorithms may decrease the chances of postoperative visual quality problems in both high myopia patients and hyperopic patients.<sup>[4, 5]</sup>

Despite abundant literature on visual quality after corneal refractive surgery<sup>[6-8]</sup>, a multivariate analysis of high myopia, studying preoperative patient data, ablation profile, and visual quality in advance surface ablation has not been conducted. Patients’ preoperative data and corneal ablation measurements (optical diameter and ablation depth) have previously been reported—however, do these factors also play important roles in postoperative visual quality in high myopia? And which factors are most significantly related to postoperative visual quality? Furthermore, it is unknown whether the epithelium flap creation method plays a role in postoperative visual quality. Thus, the current study



1  
2  
3 aims to investigate the significant factors influencing visual quality in advanced  
4  
5  
6 surface ablations in high myopia.  
7  
8

## 9 **Materials and Methods**

### 10 11 12 Study design

13  
14  
15  
16 A cross-sectional study was performed to assess the factors influencing  
17  
18 advanced surface ablation for the treatment of high myopia with more than one  
19  
20 year follow up (average  $1.32 \pm 0.21$  y, range 1~1.6y). From patients' surgical  
21  
22 records, we collected preoperative refraction, pupil size, central corneal  
23  
24 thickness, patient age and gender, methods of epithelial flap creation, optical  
25  
26 zone diameter, and ablation depth. All surgical procedures were performed at  
27  
28 the Eye and ENT Hospital of Fudan University, and informed consents were  
29  
30 acquired prior to the study. The study followed the tenets of the Declaration of  
31  
32 Helsinki and was approved by the ethics committee of the Eye and ENT  
33  
34 Hospital of Fudan University (No. YYJG2007-03).  
35  
36  
37  
38  
39  
40

### 41 Patient selection

42  
43  
44 This study included high myopic patients (-6 D or more with up to -3 D of  
45  
46 astigmatism) who had chosen to undergo surface ablation over intraocular  
47  
48 lens implantation. Participants underwent the procedure at the same surgical  
49  
50 session.  
51  
52

### 53 54 55 Measurements

1  
2  
3 Preoperative examinations included uncorrected visual acuity (UCVA), best  
4 corrected visual acuity (BCVA), non-cycloplegic manifest refraction, intraocular  
5 pressure, corneal topography, corneal pachymetry, contrast sensitivity,  
6 wavefront aberrations, slit-lamp examination, and dilated fundus examination.  
7  
8 Before the preoperative examination, contact lenses were discontinued for at  
9  
10  
11  
12  
13  
14  
15  
16  
17  
18  
19  
20  
21  
22  
23  
24  
25  
26  
27  
28  
29  
30  
31  
32  
33  
34  
35  
36  
37  
38  
39  
40  
41  
42  
43  
44  
45  
46  
47  
48  
49  
50  
51  
52  
53  
54  
55  
56  
57  
58  
59  
60

least 3 weeks in rigid lens wearers and for at least 1 week in soft contact lens wearers.

Pre- and post-operative higher order aberrations (HOAs) were measured with a Hartmann-Shack aberrometer (WASCA, Carl Zeiss Meditec, Jena, Germany) in scotopic conditions after 10 minutes of dark adaptation. Data were calculated within both 5mm and 3mm analysis diameters. Contrast sensitivity was measured with a Contrast Glare tester CGT-1000 (Takagi Seiko Corp, Toyama, Japan). The CGT-1000 uses 6 types of ring-like targets with 12 levels of contrast for measurement. The target sizes are of 6.3°, 4°, 2.5°, 1.6°, 1.0°, and 0.7° visual angles, which correspond to 6 through 12 cycles/degree (cpd) in spatial frequencies. BCVA was measured first under mesopic conditions, and then under photopic conditions.

### Surgical technique

LASEK treatments began with 20% alcohol-assisted epithelial removal, followed by standard excimer laser ablation with a Mel-80 excimer laser (Software version: 3.6, Carl Zeiss Meditec AG, Jena, Germany; Tissue Saving Ablation (TSA) profiles; standard nomogram). As the patient focused on a

1  
2  
3 fixation light, the excimer laser energy was delivered to the cornea centered on  
4  
5 the optical axis. The epithelium was repositioned after laser ablation, and a  
6  
7 bandage contact lens applied.  
8  
9

10  
11 During Epi-LASIK, the rotational epi-LASIK microkeratome (KM-5000D, Wuxi  
12  
13 Kangming Medical Device Corp, Wuxi, China) was used to create the epithelial  
14  
15 sheet.<sup>[9]</sup> The remainder of the procedure closely mirrored the LASEK  
16  
17 procedure.  
18  
19

20  
21 Mitomycin C was not used in either LASEK or epi-LASIK cases. Bandage  
22  
23 contact lenses were removed when epithelialization was complete (usually  
24  
25 between postoperative day 3 and 7).  
26  
27

### 28 29 30 Statistical analysis

31  
32  
33 One eye of each patient was randomly chosen for analysis. Statistical analysis  
34  
35 was performed using SAS software (version 9.2). Continuous variables are  
36  
37 expressed as the mean  $\pm$ SD. A normality test and homogeneity test of  
38  
39 variance were performed before analysis. Logarithmic transformation was  
40  
41 used for variables with skewed distributions. T-test, repeated measures  
42  
43 analysis of variance (ANOVA), multivariate linear regression, and multivariate  
44  
45 logistic regression were performed in the influencing factors analysis. The  
46  
47 chi-squared test and row mean scores difference test was used for analysis of  
48  
49 qualitative data. The chi-squared test and one-way ordinal data for mean  
50  
51 difference test were used for qualitative data represented in frequencies. The  
52  
53  
54  
55  
56  
57  
58  
59  
60

95% confidence intervals are shown with upper and lower limits. *P* values less than 0.05 were considered statistically significant.

## Results

### Patient Characteristics

A total of 138 eyes of 138 consecutive high myopic patients were included (68 females, 70 males). Patient age at the time of refractive surgery was  $31.1 \pm 9.0$  years (range, 19 to 52). The spherical equivalent refraction refractive error was  $-11.78 \pm 1.89$  D (range, -8.25 to -17.00). The preoperative central corneal thickness was  $513.1 \pm 24.1$   $\mu\text{m}$  (range, 452 to 613). The preoperative mesopic pupil size was  $6.04 \pm 0.83$  mm (range, 5.2 to 7.0). The ablation zone was  $5.72 \pm 0.23$  mm (range, 5.0 to 6.25). The ablation depth was  $139.9 \pm 15.6$   $\mu\text{m}$  (range, 108 to 177).

### Wavefront aberration

Mean postoperative root-mean-square (RMS) wavefront aberration values were significantly greater than those obtained preoperatively under both 5mm and 3mm analysis diameters (all  $P < 0.05$ ). Coma-like, spherical-like aberrations and spherical aberration all increased significantly under the analysis diameters of 5 mm and 3 mm (all  $P < 0.05$ ), with greater values observed in the 5 mm analysis diameter. (Table 1)

Results of multivariate analysis of wavefront aberrations with 5 mm analysis diameter are presented in table 2. Smaller optical zone ( $\beta$ (coefficient

value)=-1.17,  $P=0.037$ ) and younger age ( $\beta=-0.07$ ,  $P<0.001$ ) were found to be associated with higher RMS values of HOAs. Age ( $\beta=-0.06$ ,  $P=0.002$ ) and male gender ( $\beta=-0.08$ ,  $P=0.028$ ) were associated with higher coma-like aberrations. Smaller optical zone ( $\beta=-0.38$ ,  $P<0.001$ ), method of epithelial flap creation ( $\beta=-0.07$ ,  $P=0.01$ ), and younger age ( $\beta=-0.06$ ,  $P<0.001$ ) were associated with increased spherical-like aberration. Although smaller optical zone and younger age were associated with the increase in spherical-like aberrations and decrease in spherical aberration, respectively, under 3mm of analysis diameter, the coefficient of determination values were very small (all  $r^2<0.1$ )

Table 1. Mean higher order aberrations before and 1 year after surgery (Mean  $\pm$  SD,  $\mu\text{m}$ )

|                        | HOAs            | coma-like         | spherical-like    | spherical aberration |
|------------------------|-----------------|-------------------|-------------------|----------------------|
| 5 mm analysis diameter |                 |                   |                   |                      |
| Preoperative           | 0.19 $\pm$ 0.11 | 0.154 $\pm$ 0.098 | 0.092 $\pm$ 0.063 | -0.024 $\pm$ 0.187   |
| Postoperative          | 0.11 $\pm$ 0.07 | 0.334 $\pm$ 0.131 | 0.393 $\pm$ 0.136 | -0.862 $\pm$ 0.321   |
| <i>P</i> value         | <0.001          | <0.001            | <0.001            | <0.001               |
| 3 mm analysis diameter |                 |                   |                   |                      |
| Preoperative           | 0.55 $\pm$ 0.13 | 0.077 $\pm$ 0.062 | 0.059 $\pm$ 0.043 | 0.069 $\pm$ 0.090    |
| Postoperative          | 0.14 $\pm$ 0.04 | 0.110 $\pm$ 0.042 | 0.073 $\pm$ 0.024 | -0.131 $\pm$ 0.061   |
| <i>P</i> value         | 0.001           | <0.001            | 0.012             | <0.001               |

HOAs: high order aberrations

Table 2. Multivariate analysis of higher order aberrations (meaningful coefficient value)

|                  | 5 mm pupil diameter |          |           |          | 3 mm pupil diameter |     |         |         |
|------------------|---------------------|----------|-----------|----------|---------------------|-----|---------|---------|
|                  | HOAS                | CLA      | SLA       | SA       | HOAS                | CLA | SLA     | SA      |
| Age              |                     |          |           |          |                     |     |         |         |
| $\beta$ value    | -0.072***           | -0.057** | -0.055*** | 0.084*   |                     |     |         |         |
| Gender           |                     |          |           |          |                     |     |         |         |
| $\beta$ value    |                     | -0.079*  |           |          |                     |     |         | 0.066** |
| Methods          |                     |          |           |          |                     |     |         |         |
| $\beta$ value    |                     |          | -0.074*   |          |                     |     |         |         |
| Optical diameter |                     |          |           |          |                     |     |         |         |
| $\beta$ value    | -1.167*             |          | -0.376*** | 0.729*** |                     |     | -0.061* |         |
| Ablation depth   |                     |          |           |          |                     |     |         |         |
| $\beta$ value    |                     |          |           | -0.005*  |                     |     |         |         |

HOAS= higher order aberrations    CLA = coma-like aberration    SLA = spherical-like aberration

SA = spherical aberration     $\beta$  value = coefficient value    \* $P < 0.05$ , \*\* $P < 0.01$ , \*\*\* $P < 0.001$

### Contrast sensitivity

The contrast sensitivity (CS) results are summarized in table 3. CS was significantly lower at all spatial frequencies under mesopic conditions and at all spatial frequencies except 6.3° and 4.0° visual targets under photopic conditions, at 1-year postoperative follow-up.

Three factors, including preoperative refraction, age and optical diameter, were found to be related to the change in contrast sensitivity. At 4.0°, 2.5°, 1.6°, and 1.0° visual targets, preoperative refractive error was associated with decreased contrast sensitivity (all  $P < 0.05$ ). Under mesopic conditions, a smaller optical zone was associated with decreased contrast sensitivity at the 6.3° visual target ( $\beta = -0.02$ ,  $P = 0.018$ ), and younger age was associated with

1  
2  
3 decreased contrast sensitivity at the 0.7° visual target ( $\beta=-0.03$ ,  $P=0.044$ );  
4  
5  
6 however, the values of the coefficients of determination were too small to  
7  
8 confirm these relationships in both cases ( $r^2<0.1$ ). In the multivariate analysis  
9  
10 of contrast sensitivity under photopic conditions (Table 4), higher preoperative  
11  
12 refractive error was associated with decreased contrast sensitivity values at  
13  
14 4.0°( $\beta=-0.003$ ,  $P=0.001$ ), 2.5°( $\beta=-0.005$ ,  $P<0.001$ ), 1.6°( $\beta=-0.007$ ,  $P<0.001$ ),  
15  
16 and 1.0°( $\beta=-0.01$ ,  $P=0.011$ ) visual targets.  
17  
18  
19  
20  
21

22 Table 3. Contrast sensitivity before and after surgery (log unit)

|                       | Target Size (°) |             |             |             |             |             |
|-----------------------|-----------------|-------------|-------------|-------------|-------------|-------------|
|                       | 6.3             | 4.0         | 2.5         | 1.6         | 1.0         | 0.7         |
| In mesopic condition  |                 |             |             |             |             |             |
| Preoperative          | 1.696±0.218     | 1.676±0.241 | 1.532±0.228 | 1.289±0.230 | 1.003±0.256 | 0.712±0.281 |
| Postoperative         | 1.542±0.194     | 1.514±0.211 | 1.353±0.240 | 1.114±0.238 | 0.849±0.261 | 0.576±0.206 |
| <i>P</i> value        | <0.001          | <0.001      | <0.001      | <0.001      | <0.001      | <0.001      |
| In photopic condition |                 |             |             |             |             |             |
| Preoperative          | 1.510±0.246     | 1.499±0.280 | 1.331±0.278 | 1.124±0.265 | 0.854±0.259 | 0.635±0.197 |
| Postoperative         | 1.455±0.247     | 1.447±0.243 | 1.269±0.253 | 1.035±0.248 | 0.786±0.243 | 0.548±0.206 |
| <i>P</i> value        | 0.02            | 0.03        | 0.01        | <0.001      | 0.006       | 0.004       |

Table 4. Multivariate analysis of contrast sensitivity (meaningful coefficient value)

|                  | Mesopic |           |           |           |         |         | Photopic |          |          |          |     |     |
|------------------|---------|-----------|-----------|-----------|---------|---------|----------|----------|----------|----------|-----|-----|
|                  | 6.3     | 4.0       | 2.5       | 1.6       | 1.0     | 0.7     | 6.3      | 4.0      | 2.5      | 1.6      | 1.0 | 0.7 |
| Refraction       |         |           |           |           |         |         |          |          |          |          |     |     |
| $\beta$ value    |         | -0.003*** | -0.005*** | -0.007*** | -0.010* |         | -0.004** | -0.005** | -0.007** | -0.010** |     |     |
| CCT              |         |           |           |           |         |         |          |          |          |          |     |     |
| $\beta$ value    |         |           |           |           |         |         |          |          | 0.0005*  |          |     |     |
| Age              |         |           |           |           |         |         |          |          |          |          |     |     |
| $\beta$ value    |         |           |           |           |         | -0.028* |          |          |          |          |     |     |
| optical diameter |         |           |           |           |         |         |          |          |          |          |     |     |
| $\beta$ value    | -0.015* |           |           |           |         |         |          |          |          |          |     |     |

CCT = central corneal thickness

$\beta$  value = coefficient value      \* $P < 0.05$ , \*\* $P < 0.01$ , \*\*\* $P < 0.001$

### Slit lamp examination

At 1-year post-operative follow-up, 96.38% (133/138) of eyes were clear and 3.62% (5/138) had trace haze. None of the eyes in the study developed corneal haze worse than grade 1, and haze did not affect the visual acuity in any of the operated eyes.

### Discussion

Laser refractive surgery increases ocular aberrations in mild, moderate, and high myopia.<sup>[7, 10-13]</sup> HOA changes after laser ablations are one of the main factors affecting the visual quality after refractive operations.<sup>[12, 13]</sup>

Spherical-like aberrations can be described as decreased retinal image quality



1  
2  
3 with a mesopic pupil diameter. It is greater when light enters the pupil from the  
4 periphery, and is not found at the pupil center. For a large pupil, the effects of  
5 aberration are increased approximately 10 to 20-fold.<sup>[10, 11, 14]</sup> In previous  
6 studies, Alarcón and colleagues<sup>[1]</sup> found that retinal image quality was affected  
7 by pupil size only when the pupil size was larger than the optical zone. The  
8 research of Kyoung Yul Seo et al.<sup>[8]</sup> and Endl et al.<sup>[15]</sup> also indicated that  
9 wavefront aberrations after refractive surgery with a larger ablation zone are  
10 less pronounced and closer to physiological level than those with a regular  
11 ablation zone. Consistent with previous studies<sup>[10, 15]</sup>, we also found that a  
12 smaller optical zone is associated with greater changes in HOAs. One  
13 explanation for these similar results is that light passes through the area  
14 connecting the ablation zone and the transition zone under a smaller optical  
15 zone and larger pupil diameter, which increases the aberration and reduces  
16 the contrast of the retinal image. All of the above may be the causes of glare  
17 and halo encountered at night in patients with smaller ablation zones and  
18 larger pupil diameters. It is clear that a larger optical zone design prevents a  
19 significant increase in HOAs, which would in turn decrease visual quality.

20  
21  
22  
23  
24  
25  
26  
27  
28  
29  
30  
31  
32  
33  
34  
35  
36  
37  
38  
39  
40  
41  
42  
43  
44 In the present study, younger high myopia patients were more likely to  
45 experience an increase in postoperative HOAs. This correlation has never  
46 been reported in previous studies, and may be related to the corneal wound  
47 healing process after surgery. Previous studies showed that corneal wound  
48 healing was critical to the success of topography-guided or wavefront-guided  
49 excimer laser ablation to optimize visual performance.<sup>[16, 17]</sup> Moreno-Barriuso

1  
2  
3 et al.'s study<sup>[12]</sup> reported that the presence of stromal opacities induced by the  
4  
5 corneal wound healing process after refractive surgery caused a loss of  
6  
7 corneal transparency and an increase of scattering. In addition, histological  
8  
9 studies suggested that individual variation in the wound healing process was a  
10  
11 major factor affecting refractive surgery outcomes. It is possible that  
12  
13 proliferation of corneal stromal cells in young people is more active, which  
14  
15 results in elevated degrees of tissue repair. Consequently, younger patients  
16  
17 undergoing surface ablation procedures should be informed of the possibility  
18  
19 of visual disturbances after surgery, and should receive close follow-up  
20  
21 postoperatively.  
22  
23  
24  
25  
26

27  
28 Contrast sensitivity is another important indicator of visual quality. Previous  
29  
30 studies revealed that in eyes undergoing PRK, contrast sensitivity was  
31  
32 reduced at the early postoperative stage but gradually returned to preoperative  
33  
34 levels after approximately 6 to 12 months.<sup>[18, 19]</sup> A study by Ghaith and  
35  
36 colleagues<sup>[20]</sup> showed that PRK significantly reduced contrast sensitivity and  
37  
38 induced glare at all spatial frequencies at 1 month postoperatively. These  
39  
40 effects seemed to persist over time at lower spatial frequencies, but there was  
41  
42 a trend toward recovery at higher spatial frequencies at 6 months. Contrary to  
43  
44 their reports, our investigation revealed that contrast sensitivity under both  
45  
46 lighting and dim conditions was worse with higher preoperative refractive  
47  
48 errors for long-term observation. In particular, the decrease in contrast  
49  
50 sensitivity under mesopic conditions was greater than that under photopic  
51  
52 conditions. Interestingly, preoperative refractive error was significantly  
53  
54  
55  
56  
57  
58  
59  
60

1  
2  
3 associated with decreased contrast sensitivity values in both photopic and  
4  
5 mesopic conditions. One explanation may be that in high myopes, the change  
6  
7 in postoperative corneal asphericity resulting in light scattering from the tips of  
8  
9 the radial scars and irregular astigmatism in or near the central clear zone may  
10  
11 lead to a significant drop in contrast sensitivity function (CSF) at medium to  
12  
13 high spatial frequencies.<sup>[2]</sup> The present study also reveals that surgical factors,  
14  
15 including the method of epithelial flap creation, optical zone, and ablation  
16  
17 depth, did not affect postoperative contrast sensitivity under either lighting  
18  
19 condition. This may be because all selected cases had myopia of -6.00 D or  
20  
21 more; the effect of high myopia correction on contrast sensitivity could be a  
22  
23 completely distinct relationship. Therefore, further research is needed to verify  
24  
25 the association between these surgical factors and contrast sensitivity in  
26  
27 patients with differing levels of refractive error.  
28  
29  
30  
31  
32  
33

34  
35 Increasing HOAs and decreasing contrast sensitivity are associated with poor  
36  
37 visual quality in high myopic patients. In our study, the method of epithelial flap  
38  
39 creation had no effect on the HOAs or contrast sensitivity under mesopic and  
40  
41 photopic conditions. The most significant factor was the ablation procedure.  
42  
43 The relationship between age and higher order aberrations require further  
44  
45 study and confirmation. Nonetheless, our results identified the significance of  
46  
47 surgical and patient factors on postoperative visual quality; these findings are  
48  
49 clinically important for providers and patients alike in choosing the optimal  
50  
51 procedure and predicting visual quality outcomes.  
52  
53  
54  
55  
56  
57  
58  
59  
60

1  
2  
3 A limitation of the study is that the participants were recruited from Shanghai  
4  
5 only for the sake of patients' convenience, which might lead to limited external  
6  
7 validity. In addition, although the influence of corneal refractive surgery on  
8  
9 postoperative contrast sensitivity of high myopia patients is mostly  
10  
11 concentrated in the middle frequency band, a larger range of target  
12  
13 frequencies should be evaluated in the future for a more comprehensive  
14  
15 assessment.  
16  
17  
18  
19  
20

21 In conclusion, for high myopia patients, a larger optical zone diameter design  
22  
23 is recommended to achieve better postoperative visual quality in advanced  
24  
25 surface ablation. Patient age and preoperative refraction may also predict  
26  
27 postoperative visual quality.  
28  
29  
30  
31  
32  
33  
34

#### 35 Author contributions:

36  
37 Concept and design (J.Z. and Y.X.); analysis and interpretation (J.Z. and M.L.);  
38  
39 writing the article (J.Z. and Y.X.); critical revision of the article (M.K. and X.Z.);  
40  
41 final approval of the article (J.Z., Y.X., M.L., M.K. and X.Z.); data collection (J.Z.  
42  
43 and Y.X.); provision of materials, patients or resources (Y.X.); statistical  
44  
45 expertise (M.L.) and literature research (Y.X.). All authors have reviewed the  
46  
47 manuscript.  
48  
49  
50

#### 51 Acknowledgement

52  
53  
54 Thanks are due to Katherine Ni (School of Medicine, New York University,  
55  
56 New York, New York) for assistance with the grammatical errors and incr  
57  
58  
59  
60

1  
2  
3 easing the readability of the article.  
4  
5  
6  
7

8  
9 *References*  
10

- 11  
12  
13 1. Alarcón A, Rubiño M, Pérez-Ocón F, Jiménez JR. Theoretical analysis of  
14 the effect of pupil size, initial myopic level, and optical zone on quality of  
15 vision after corneal refractive surgery. *J Refract Surg.* 2012;28(12):  
16 901-906.  
17  
18  
19  
20  
21  
22 2. Anera RG1, Jiménez JR, Jiménez del Barco L, Bermúdez J, Hita E.  
23 Changes in corneal asphericity after laser in situ keratomileusis. *J Cataract*  
24 *Refract Surg.* 2003;29 (4):762-768.  
25  
26  
27  
28  
29 3. Jiménez JR, Anera RG, Díaz JA, Pérez-Ocón F. Corneal asphericity after  
30 refractive surgery when the Munnerlyn formula is applied. *J Opt Soc Am A*  
31 *Opt Image Sci Vis.* 2004;21(1):98-103.  
32  
33  
34  
35  
36 4. Jiménez JR, Alarcón A, Anera RG, Jiménez Del Barco L. Q-optimized  
37 algorithms: Theoretical analysis of factors influencing visual quality after  
38 myopic corneal refractive surgery. *J Refract Surg.* 2016;32(9): 612-617.  
39  
40  
41  
42  
43 5. Jiménez JR, Alarcón A, Anera RG, Jiménez Del Barco L. Hyperopic  
44 Q-optimized algorithms: a theoretical study on factors influencing optical  
45 quality. *Biomed Opt Express.* 2017;8(3):1405-1414.  
46  
47  
48  
49  
50 6. Teus MA1, de Benito-Llopis L, García-González M. Comparison of visual  
51 results between laser-assisted subepithelial keratectomy and epipolis  
52 laser in situ keratomileusis to correct myopia and myopic astigmatism. *Am*  
53  
54  
55  
56  
57  
58  
59  
60

- 1  
2  
3 J Ophthalmol. 2008;146(3):357-362.  
4  
5  
6 7. Almahmoud T, Munger R, Jackson WB. Effects of advanced surface  
7  
8 ablations and intralase femtosecond LASIK on higher order aberrations  
9  
10 and visual acuity outcome. Saudi J Ophthalmol. 2011;25(3):275-280.  
11  
12  
13 8. Seo KY, Lee JB, Kang JJ, et al. Comparison of higher-order aberrations  
14  
15 after LASEK with a 6.0 mm ablation zone and a 6.5 mm ablation zone with  
16  
17 blend zone. J Cataract Refract Surg. 2004;30(3):653-657.  
18  
19  
20 9. Chen CD, Chu RY, Dai JH, Zhou XT. An experimental study on the  
21  
22 separation of human corneal epithelium with different blade edge  
23  
24 sharpness of the ultra-thin microkeratome. Chinese Journal of  
25  
26 Ophthalmology and Otorhinolaryngology. 2004;4:211-213.  
27  
28  
29 10. Oshika T, Klyce SD, Applegate RA, et al. Comparison of corneal wavefront  
30  
31 aberrations after photorefractive keratectomy and laser in situ  
32  
33 keratomileusis. Am J Ophthalmol. 1999;127(1):1-7.  
34  
35  
36 11. Seiler T, Kaemmerer M, Mierdel P, Krinke HE. Ocular optical aberrations  
37  
38 after photorefractive keratectomy for myopia and myopic astigmatism.  
39  
40 Arch Ophthalmol. 2000;118(1):17-21.  
41  
42  
43 12. Moreno-Barriuso E, Lloves JM, Marcos S, et al. Ocular aberrations before  
44  
45 and after myopic corneal refractive surgery: LASIK-induced changes  
46  
47 measured with laser ray tracing. Invest Ophthalmol Vis Sci.  
48  
49 2001;42(6):1396-1403.  
50  
51  
52 13. Mrochen M, Kaemmerer M, Mierdel P, Seiler T. Increased higher-order  
53  
54 optical aberrations after laser refractive surgery. J Cataract Refract Surg.  
55  
56  
57  
58  
59  
60

- 2001;27(3):362-9.
14. Oliver KM, Hemenger RP, Corbett MC, et al. Corneal optical aberrations induced by photorefractive keratectomy. *J Refract Surg.* 1997;13(3):246-254.
15. Endl MJ, Martinez CE, Klyce SD, et al. Effect of larger ablation zone and transition zone on corneal optical aberrations after photorefractive keratectomy. *Arch Ophthalmol.* 2001;119(8):1159-1164.
16. Wilson SE, Mohan RR, Hong JW, et al. The wound healing response after laser in situ keratomileusis and photorefractive keratectomy: elusive control of biological variability and effect on custom laser vision correction. *Arch Ophthalmol.* 2001;119(6):889-896.
17. Netto MV, Mohan RR, Ambrosio RJ, et al. Wound Healing in the Cornea A Review of Refractive Surgery Complications and New Prospects for Therapy. *Cornea.* 2005;24(5):509-522.
18. Wang Z, Chan J, Yang B. Comparison of laser in situ keratomileusis and photo refractive keratectomy to correct myopia from - 1.25 to - 6.00 diopters. *J Refract Surg.* 1997;13(6):528-534.
19. Corbett MC, Prydal JI, Verma S, et al. Investigation of the structures responsible for corneal haze after photorefractive keratectomy and their effect on visual function. *J Ophthalmol.* 1996;103(9):1366-1380.
20. Ghaith AA, Daniel J, Stulting RD, et al. Contrast sensitivity and glare disability after radial keratotomy and photorefractive keratectomy. *Arch Ophthalmol.* 1998;116(1):12-18.

**STROBE 2007 (v4) Statement—Checklist of items that should be included in reports of *cross-sectional studies***

| Section/Topic                | Item # | Recommendation                                                                                                                                                                       | Reported on page # |
|------------------------------|--------|--------------------------------------------------------------------------------------------------------------------------------------------------------------------------------------|--------------------|
| Title and abstract           | 1      | (a) Indicate the study's design with a commonly used term in the title or the abstract                                                                                               | 3-4                |
|                              |        | (b) Provide in the abstract an informative and balanced summary of what was done and what was found                                                                                  | 3-4                |
| <b>Introduction</b>          |        |                                                                                                                                                                                      |                    |
| Background/rationale         | 2      | Explain the scientific background and rationale for the investigation being reported                                                                                                 | 6                  |
| Objectives                   | 3      | State specific objectives, including any prespecified hypotheses                                                                                                                     | 6                  |
| <b>Methods</b>               |        |                                                                                                                                                                                      |                    |
| Study design                 | 4      | Present key elements of study design early in the paper                                                                                                                              | 7                  |
| Setting                      | 5      | Describe the setting, locations, and relevant dates, including periods of recruitment, exposure, follow-up, and data collection                                                      | 7,8,9,10           |
| Participants                 | 6      | (a) Give the eligibility criteria, and the sources and methods of selection of participants                                                                                          | 7,8                |
| Variables                    | 7      | Clearly define all outcomes, exposures, predictors, potential confounders, and effect modifiers. Give diagnostic criteria, if applicable                                             | 8,9                |
| Data sources/<br>measurement | 8*     | For each variable of interest, give sources of data and details of methods of assessment (measurement). Describe comparability of assessment methods if there is more than one group | 8,9                |
| Bias                         | 9      | Describe any efforts to address potential sources of bias                                                                                                                            |                    |
| Study size                   | 10     | Explain how the study size was arrived at                                                                                                                                            |                    |
| Quantitative variables       | 11     | Explain how quantitative variables were handled in the analyses. If applicable, describe which groupings were chosen and why                                                         | 7,8                |
| Statistical methods          | 12     | (a) Describe all statistical methods, including those used to control for confounding                                                                                                | 9,10               |
|                              |        | (b) Describe any methods used to examine subgroups and interactions                                                                                                                  |                    |
|                              |        | (c) Explain how missing data were addressed                                                                                                                                          |                    |
|                              |        | (d) If applicable, describe analytical methods taking account of sampling strategy                                                                                                   |                    |
|                              |        | (e) Describe any sensitivity analyses                                                                                                                                                |                    |
| <b>Results</b>               |        |                                                                                                                                                                                      |                    |



|                          |     |                                                                                                                                                                                                                                                                                                                                                                                                               |       |
|--------------------------|-----|---------------------------------------------------------------------------------------------------------------------------------------------------------------------------------------------------------------------------------------------------------------------------------------------------------------------------------------------------------------------------------------------------------------|-------|
| Participants             | 13* | (a) Report numbers of individuals at each stage of study—eg numbers potentially eligible, examined for eligibility, confirmed eligible, included in the study, completing follow-up, and analysed<br>(b) Give reasons for non-participation at each stage<br>(c) Consider use of a flow diagram                                                                                                               | 7,10  |
| Descriptive data         | 14* | (a) Give characteristics of study participants (eg demographic, clinical, social) and information on exposures and potential confounders<br>(b) Indicate number of participants with missing data for each variable of interest                                                                                                                                                                               | 10    |
| Outcome data             | 15* | Report numbers of outcome events or summary measures                                                                                                                                                                                                                                                                                                                                                          | 10-14 |
| Main results             | 16  | (a) Give unadjusted estimates and, if applicable, confounder-adjusted estimates and their precision (eg, 95% confidence interval). Make clear which confounders were adjusted for and why they were included<br>(b) Report category boundaries when continuous variables were categorized<br>(c) If relevant, consider translating estimates of relative risk into absolute risk for a meaningful time period | 12,14 |
| Other analyses           | 17  | Report other analyses done—eg analyses of subgroups and interactions, and sensitivity analyses                                                                                                                                                                                                                                                                                                                |       |
| <b>Discussion</b>        |     |                                                                                                                                                                                                                                                                                                                                                                                                               |       |
| Key results              | 18  | Summarise key results with reference to study objectives                                                                                                                                                                                                                                                                                                                                                      | 14-17 |
| Limitations              | 19  | Discuss limitations of the study, taking into account sources of potential bias or imprecision. Discuss both direction and magnitude of any potential bias                                                                                                                                                                                                                                                    | 18    |
| Interpretation           | 20  | Give a cautious overall interpretation of results considering objectives, limitations, multiplicity of analyses, results from similar studies, and other relevant evidence                                                                                                                                                                                                                                    | 18    |
| Generalisability         | 21  | Discuss the generalisability (external validity) of the study results                                                                                                                                                                                                                                                                                                                                         | 18    |
| <b>Other information</b> |     |                                                                                                                                                                                                                                                                                                                                                                                                               |       |
| Funding                  | 22  | Give the source of funding and the role of the funders for the present study and, if applicable, for the original study on which the present article is based                                                                                                                                                                                                                                                 | 2     |

\*Give information separately for cases and controls in case-control studies and, if applicable, for exposed and unexposed groups in cohort and cross-sectional studies.

**Note:** An Explanation and Elaboration article discusses each checklist item and gives methodological background and published examples of transparent reporting. The STROBE checklist is best used in conjunction with this article (freely available on the Web sites of PLoS Medicine at <http://www.plosmedicine.org/>, Annals of Internal Medicine at <http://www.annals.org/>, and Epidemiology at <http://www.epidem.com/>). Information on the STROBE Initiative is available at [www.strobe-statement.org](http://www.strobe-statement.org).

# BMJ Open

## Preoperative refraction, age and optical zone as predictors of optical and visual quality after advanced surface ablation in high myopic patients: a cross-sectional study

|                                                                                                                                                         |                                                                                                                                                                                                                                                                                                                     |
|---------------------------------------------------------------------------------------------------------------------------------------------------------|---------------------------------------------------------------------------------------------------------------------------------------------------------------------------------------------------------------------------------------------------------------------------------------------------------------------|
| Journal:                                                                                                                                                | <i>BMJ Open</i>                                                                                                                                                                                                                                                                                                     |
| Manuscript ID                                                                                                                                           | bmjopen-2018-023877.R1                                                                                                                                                                                                                                                                                              |
| Article Type:                                                                                                                                           | Research                                                                                                                                                                                                                                                                                                            |
| Date Submitted by the Author:                                                                                                                           | 10-May-2018                                                                                                                                                                                                                                                                                                         |
| Complete List of Authors:                                                                                                                               | Zhou, Jiaqi<br>Xu, Ye; Eye and ENT Hospital of Fudan University, Ophthalmology and Vision Science<br>Li, Meiyang; Eye & ENT Hospital of Fudan University<br>Knorz, Michael; FreeVis LASIK Zentrum, Universitätsmedizin Mannheim<br>Zhou, Xingtao; Eye & ENT Hospital, Fudan University, Department of Ophthalmology |
| <b>Primary Subject Heading</b>:                                                                                                                         | Ophthalmology                                                                                                                                                                                                                                                                                                       |
| Secondary Subject Heading:                                                                                                                              | Ophthalmology                                                                                                                                                                                                                                                                                                       |
| Keywords:                                                                                                                                               | OPHTHALMOLOGY, Cataract and refractive surgery < OPHTHALMOLOGY, Ophthalmology < SURGERY                                                                                                                                                                                                                             |
| Note: The following files were submitted by the author for peer review, but cannot be converted to PDF. You must view these files (e.g. movies) online. |                                                                                                                                                                                                                                                                                                                     |
| main document final accept version.docx                                                                                                                 |                                                                                                                                                                                                                                                                                                                     |

SCHOLARONE™  
Manuscripts

**STROBE 2007 (v4) Statement—Checklist of items that should be included in reports of *cross-sectional studies***

| Section/Topic                | Item # | Recommendation                                                                                                                                                                       | Reported on page # |
|------------------------------|--------|--------------------------------------------------------------------------------------------------------------------------------------------------------------------------------------|--------------------|
| <b>Title and abstract</b>    | 1      | (a) Indicate the study’s design with a commonly used term in the title or the abstract                                                                                               | 3-4                |
|                              |        | (b) Provide in the abstract an informative and balanced summary of what was done and what was found                                                                                  | 3-4                |
| <b>Introduction</b>          |        |                                                                                                                                                                                      |                    |
| Background/rationale         | 2      | Explain the scientific background and rationale for the investigation being reported                                                                                                 | 6                  |
| Objectives                   | 3      | State specific objectives, including any prespecified hypotheses                                                                                                                     | 6                  |
| <b>Methods</b>               |        |                                                                                                                                                                                      |                    |
| Study design                 | 4      | Present key elements of study design early in the paper                                                                                                                              | 7                  |
| Setting                      | 5      | Describe the setting, locations, and relevant dates, including periods of recruitment, exposure, follow-up, and data collection                                                      | 7,8,9,10           |
| Participants                 | 6      | (a) Give the eligibility criteria, and the sources and methods of selection of participants                                                                                          | 7,8                |
| Variables                    | 7      | Clearly define all outcomes, exposures, predictors, potential confounders, and effect modifiers. Give diagnostic criteria, if applicable                                             | 8,9                |
| Data sources/<br>measurement | 8*     | For each variable of interest, give sources of data and details of methods of assessment (measurement). Describe comparability of assessment methods if there is more than one group | 8,9                |
| Bias                         | 9      | Describe any efforts to address potential sources of bias                                                                                                                            |                    |
| Study size                   | 10     | Explain how the study size was arrived at                                                                                                                                            |                    |
| Quantitative variables       | 11     | Explain how quantitative variables were handled in the analyses. If applicable, describe which groupings were chosen and why                                                         | 7,8                |
| Statistical methods          | 12     | (a) Describe all statistical methods, including those used to control for confounding                                                                                                | 9,10               |
|                              |        | (b) Describe any methods used to examine subgroups and interactions                                                                                                                  |                    |
|                              |        | (c) Explain how missing data were addressed                                                                                                                                          |                    |
|                              |        | (d) If applicable, describe analytical methods taking account of sampling strategy                                                                                                   |                    |
|                              |        | (e) Describe any sensitivity analyses                                                                                                                                                |                    |
| <b>Results</b>               |        |                                                                                                                                                                                      |                    |

|                          |     |                                                                                                                                                                                                                                                                                                                                                                                                               |       |
|--------------------------|-----|---------------------------------------------------------------------------------------------------------------------------------------------------------------------------------------------------------------------------------------------------------------------------------------------------------------------------------------------------------------------------------------------------------------|-------|
| Participants             | 13* | (a) Report numbers of individuals at each stage of study—eg numbers potentially eligible, examined for eligibility, confirmed eligible, included in the study, completing follow-up, and analysed<br>(b) Give reasons for non-participation at each stage<br>(c) Consider use of a flow diagram                                                                                                               | 7,10  |
| Descriptive data         | 14* | (a) Give characteristics of study participants (eg demographic, clinical, social) and information on exposures and potential confounders<br>(b) Indicate number of participants with missing data for each variable of interest                                                                                                                                                                               | 10    |
| Outcome data             | 15* | Report numbers of outcome events or summary measures                                                                                                                                                                                                                                                                                                                                                          | 10-14 |
| Main results             | 16  | (a) Give unadjusted estimates and, if applicable, confounder-adjusted estimates and their precision (eg, 95% confidence interval). Make clear which confounders were adjusted for and why they were included<br>(b) Report category boundaries when continuous variables were categorized<br>(c) If relevant, consider translating estimates of relative risk into absolute risk for a meaningful time period | 12,14 |
| Other analyses           | 17  | Report other analyses done—eg analyses of subgroups and interactions, and sensitivity analyses                                                                                                                                                                                                                                                                                                                |       |
| <b>Discussion</b>        |     |                                                                                                                                                                                                                                                                                                                                                                                                               |       |
| Key results              | 18  | Summarise key results with reference to study objectives                                                                                                                                                                                                                                                                                                                                                      | 14-17 |
| Limitations              | 19  | Discuss limitations of the study, taking into account sources of potential bias or imprecision. Discuss both direction and magnitude of any potential bias                                                                                                                                                                                                                                                    | 18    |
| Interpretation           | 20  | Give a cautious overall interpretation of results considering objectives, limitations, multiplicity of analyses, results from similar studies, and other relevant evidence                                                                                                                                                                                                                                    | 18    |
| Generalisability         | 21  | Discuss the generalisability (external validity) of the study results                                                                                                                                                                                                                                                                                                                                         | 18    |
| <b>Other information</b> |     |                                                                                                                                                                                                                                                                                                                                                                                                               |       |
| Funding                  | 22  | Give the source of funding and the role of the funders for the present study and, if applicable, for the original study on which the present article is based                                                                                                                                                                                                                                                 | 2     |

\*Give information separately for cases and controls in case-control studies and, if applicable, for exposed and unexposed groups in cohort and cross-sectional studies.

**Note:** An Explanation and Elaboration article discusses each checklist item and gives methodological background and published examples of transparent reporting. The STROBE checklist is best used in conjunction with this article (freely available on the Web sites of PLoS Medicine at <http://www.plosmedicine.org/>, Annals of Internal Medicine at <http://www.annals.org/>, and Epidemiology at <http://www.epidem.com/>). Information on the STROBE Initiative is available at [www.strobe-statement.org](http://www.strobe-statement.org).
